# Supplementary material
Source: ML conference proceedings conference paper supplement (https://openaccess.thecvf.com/content/CVPR2025/html/Gadot_RL-RC-DoT_A_Block-level_CVPR_2025_paper.html)
Supplement: Supplementary file 1 [file Gadot_RL-RC-DoT_A_Block-level_CVPR_2025_supplemental.pdf]

## 7. Appendix

### 7.1. Environment and agent details

#### 7.1.1. Environment details

| Global encoder statistics used as state information |
|-----------------------------------------------------|
| Next frame x264 selected QP value                   |
| Next frame number                                   |
| Current bitstream size                              |
| Current frame x264 selected QP value                |
| Average QP                                          |
| Percentages of I type Macro Blocks                  |
| Percentages of P type Macro Blocks                  |
| Percentages of skip-type Macro Blocks               |
| x264 calculated PSNR                                |
| x264 calculated SSIM                                |
| Percentages of bits used for Motion Vectors         |
| Percentages of bits used for DCT coefficient        |
| Progress of encoding                                |
| bit-rate error                                      |
| Next frame type                                     |
| Next frame complexity                               |

Table 4. Detailed components of global encoder statistic used in state information

| Local (per-MB) encoder statistic used as state information |
|------------------------------------------------------------|
| x264 energy values per Macro Block                         |
| x264 intra encoding cost per Macro Block                   |
| x264 propagating encoding cost per Macro Block             |
| x264 inverse quantization scale factor per Macro Block     |

Table 5. Detailed components of per-MB encoder statistic used in state information

### 7.1.2. Agent architecture

To train the policy, we use the PPO algorithm [31], where the architecture of the policy is as follows: The per-block statistics are processed through a compact convolutional neural network (CNN) comprising three convolutional layers. These layers employ kernel sizes of  $3 \times 3$  or  $4 \times 4$  with a stride of 1. The resulting features are subsequently flattened and concatenated with the global statistics. A fully connected layer then derives a latent representation of dimension 64. This latent representation serves as input to three distinct fully connected networks: the value network (critic), the policy network (actor), and the reward prediction network described in the following subsection. A diagram of the full system is given in Figure 7. The agent's stochastic policy is modeled using a diagonal multivariate Gaussian distribution, where the agent learns the state-dependent mean vectors while maintaining independent standard deviation parameters for each dimension.

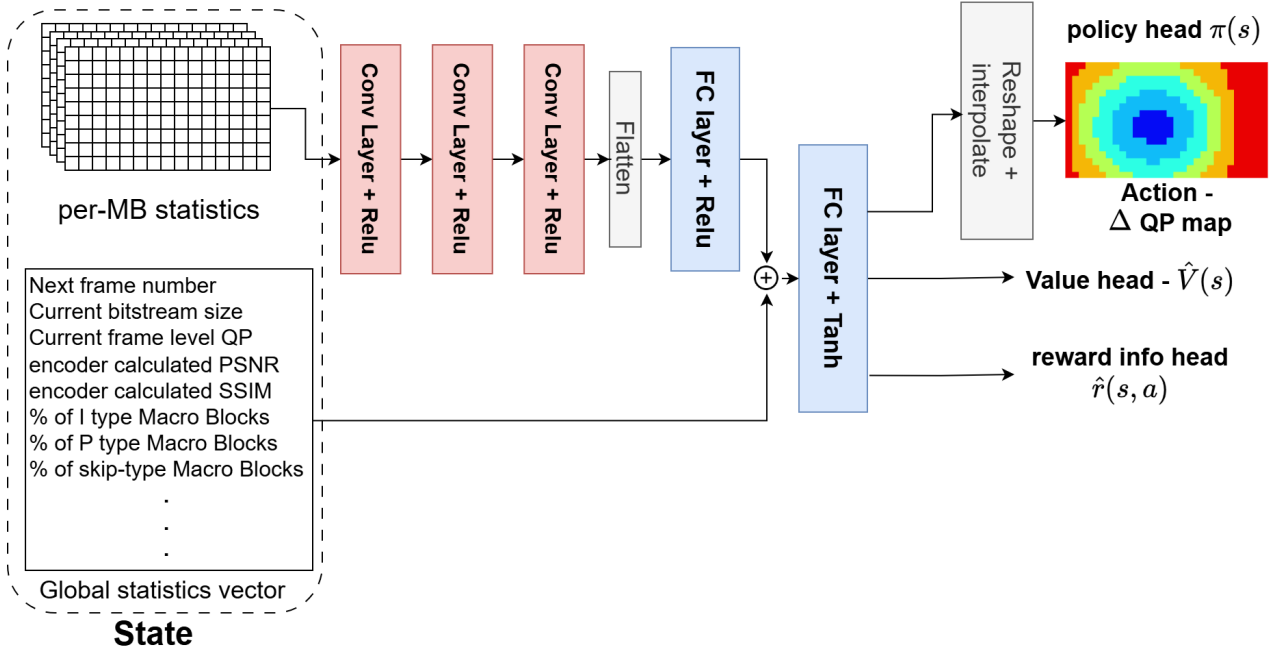

Figure 7. RL-RC-DoT agent architecture; Input is the statistics from the encoder, the output is the delta QP map

## 7.2. More details on RD-curves and BD-rate

The effectiveness of video compression is typically measured by comparing the compressed video's file size and visual quality to the original. Metrics like Peak Signal-to-Noise Ratio (PSNR) and Structural Similarity Index Measure (SSIM; [39]) are often used to objectively assess quality. When comparing two encoders the compression efficiency is usually considered. To do so, a video is encoded in several desired bit-rates with each encoder to form a rate-distortion (RD) curve, where the  $y$  axis is the quality measure, e.g. PSNR. If one encoder's curve is shifted-left than the other, it means it requires less bits to reach the same quality, rendering it more efficient. If we integrate over the entire curve, and average the result over multiple videos, we obtain a quantity specifying how much bits saves one encoder than the other, a quantity referred to as Bjontegaard delta rate (BD-rate) [41].

With the increasing usages of videos for machine vision, many researchers have recognized the need for task-aware compression and proposed a suitable evaluation metric [16, 32]. The most straightforward metric which we also use in this paper is obtained by replacing the PSNR in the RD-curve (the  $y$ -axis) with a task-specific loss measure such as mIOU or detection precision.

### 7.3. Further results

**Full results tables with bit-rate error:** Here, we provide all of the tables used in the main text with the bit-rate error data.

| ROI encoding experiment | Saliency-weighted PSNR BD-rate | PSNR BD-rate     | Bit-rate error $[1e - 3]$ |
|-------------------------|--------------------------------|------------------|---------------------------|
| RL-RC-DoT               | $-25.64 \pm 0.99$              | $-5.26 \pm 0.36$ | $-1.0 \pm 0.43$           |

Table 6. Results on RL-RC-DoT applied on the test-set for the saliency-weighted PSNR task.

|           | Precision (YOLO)  | Recall (YOLO)     | PSNR                      | Precision (SSD)  |
|-----------|-------------------|-------------------|---------------------------|------------------|
| RL-RC-DoT | $-24.7 \pm 1.57$  | $-19.75 \pm 2.97$ | $1.19 \pm 0.46$           | $-26.2 \pm 1.48$ |
|           | Recall (SSD)      | Segmentation IOU  | Bit-rate error $[1e - 3]$ |                  |
| RL-RC-DoT | $-25.81 \pm 2.03$ | $-14.6 \pm 1.81$  | $0.13 \pm 0.44$           |                  |

Table 7. BD-rate Results on RL-RC-DoT applied on test set for the car detection task for various settings. Negative values mean that RL-RC-DoT improves over baseline.

| Car detection          | Precision BD-rate              | Recall BD-rate    | PSNR BD-rate              | Bit-rate error $[1e - 3]$ |
|------------------------|--------------------------------|-------------------|---------------------------|---------------------------|
| RL-RC-DoT              | $-24.7 \pm 1.57$               | $-19.75 \pm 2.97$ | $1.19 \pm 0.46$           | $0.13 \pm 0.44$           |
| RL-RC-DoT w/o RI       | $-19.4 \pm 1.38$               | $-11.94 \pm 1.7$  | $1.92 \pm 0.41$           | $0.4 \pm 0.47$            |
| RL-RC-DoT $\gamma = 0$ | $-9.78 \pm 1.29$               | $-10.28 \pm 2.14$ | $5.44 \pm 0.6$            | $2.4 \pm 0.44$            |
| ROI encoding           | Saliency-weighted PSNR BD-rate | PSNR BD-rate      | Bit-rate error $[1e - 3]$ |                           |
| RL-RC-DoT              | $-25.64 \pm 0.99$              | $-5.26 \pm 0.36$  | $-1.0 \pm 0.43$           |                           |
| RL-RC-DoT w/o RI       | $-23.46 \pm 0.97$              | $-4.54 \pm 0.42$  | $5.3 \pm 0.48$            |                           |
| RL-RC-DoT $\gamma = 0$ | $-16.01 \pm 0.77$              | $2.11 \pm 0.31$   | $6.9 \pm 0.43$            |                           |

Table 8. Ablation study. (1) Full RL-RC-DoT (2) Omitting reward information (RI) from the training process and (3) Ignoring long term effects by using a myopic policy.

Here we give more qualitative results, Figures 9 and 9 gives more detection comparison between RL-RC-DoT and x264.



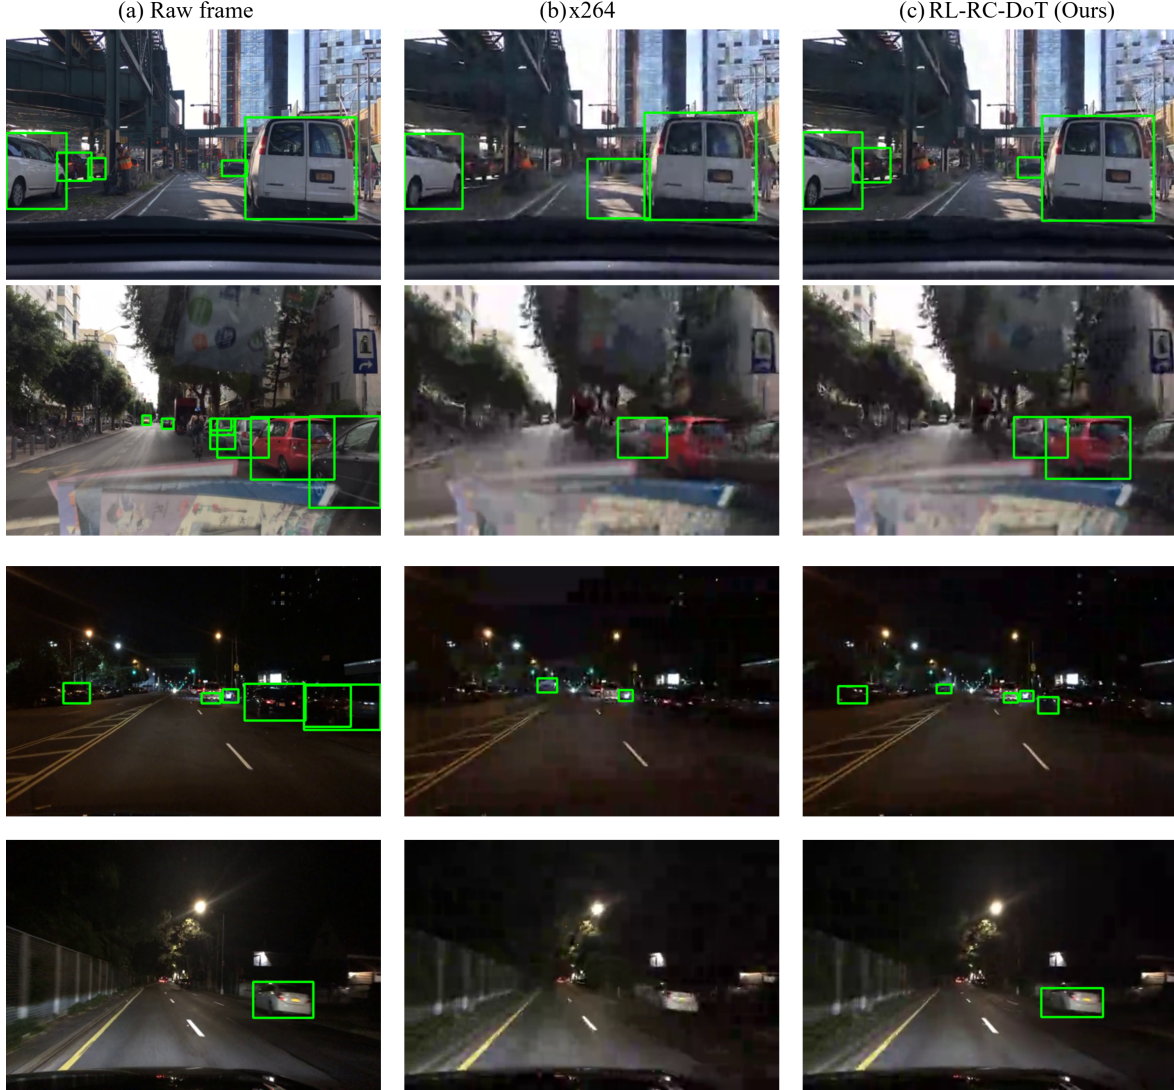

Figure 8. Car detection example result. (a) detection output on x264 reconstructed frame, (b) output on raw frame and (c) output on RL-RC-DoT reconstructed frame. Notice that both RL-RC-DoT and x264 used the same target bit-rate

**Qualitative results on task-robustness:** Figure 10, shows a qualitative example of task robustness. We compare the images in both types of rate-control, and the output of the downstream task. We can see the details corresponding to the downstream task are better reconstructed yielding a more relevant image.

### 7.3.1. Additional downstream tasks

We evaluated RL-RC-DoT with two more downstream tasks. First, in **video segmentation** using the [DAVIS](#) dataset [29]. RL-RC-DoT reduced BD-rate by 8% over x264. Quality was measured by IoU of a Mask R-CNN [11] segmentation. Second, in a **tracking** task, where the model was pre-trained for detection using the BDD dataset and tested in a different task of multi-object tracking (task shift). RL-RC-DoT reduced BD-rate by 3.2% over x264. Quality was measured by MOTA using ByteTracker [48].

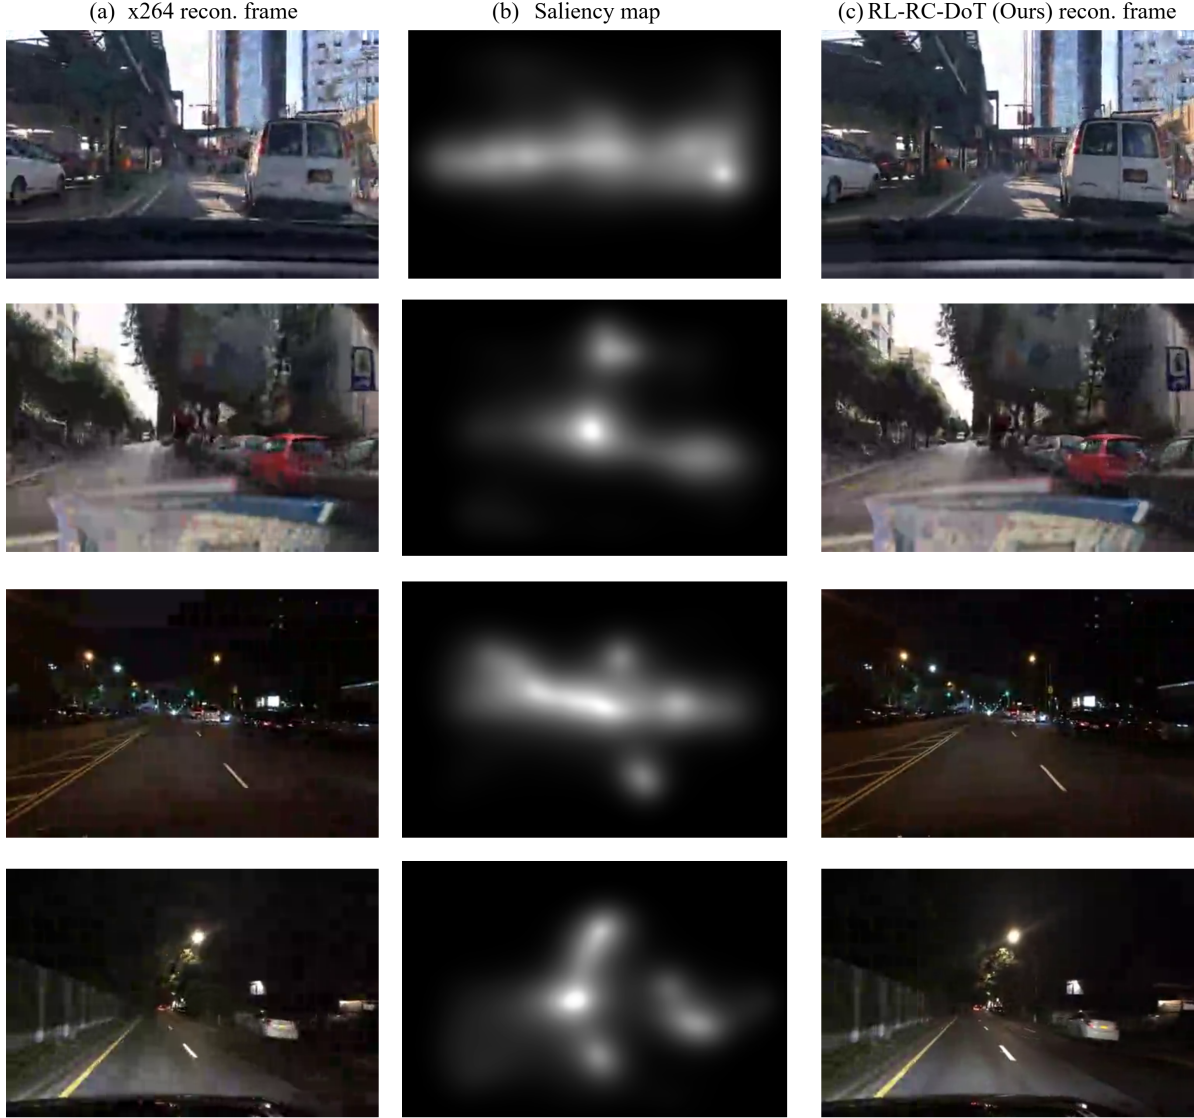

Figure 9. Saliency weighted PSNR results. (a) x264 reconstructed frame, (b) Saliency map of raw frame, extracted with [22] (c) RL-RC-DoT reconstructed frame. Notice that both RL-RC-DoT and x264 used the same target bit-rate

| x264 preset       | superfast | fast  | veryfast | medium | slower | slow  | veryslow |
|-------------------|-----------|-------|----------|--------|--------|-------|----------|
| Precision BD-rate | -14.5     | -22/8 | -21.9    | -24.7  | -23.2  | -25.2 | -24.9    |

Table 9. Test BD-rate reduction of RL-RC-DoT for various x264 presets on car detection. Negative values mean that RL-RC-DoT improves over x264.

### 7.3.2. Different x264 configurations

As mentioned in section 4.4. We only trained our agent on the *medium* preset configuration of x264. To test RL-RC-DoT generalization capabilities, we tested the agent on different preset configurations of x264. The BD-rate saving for car detection precision are shown in table 9.

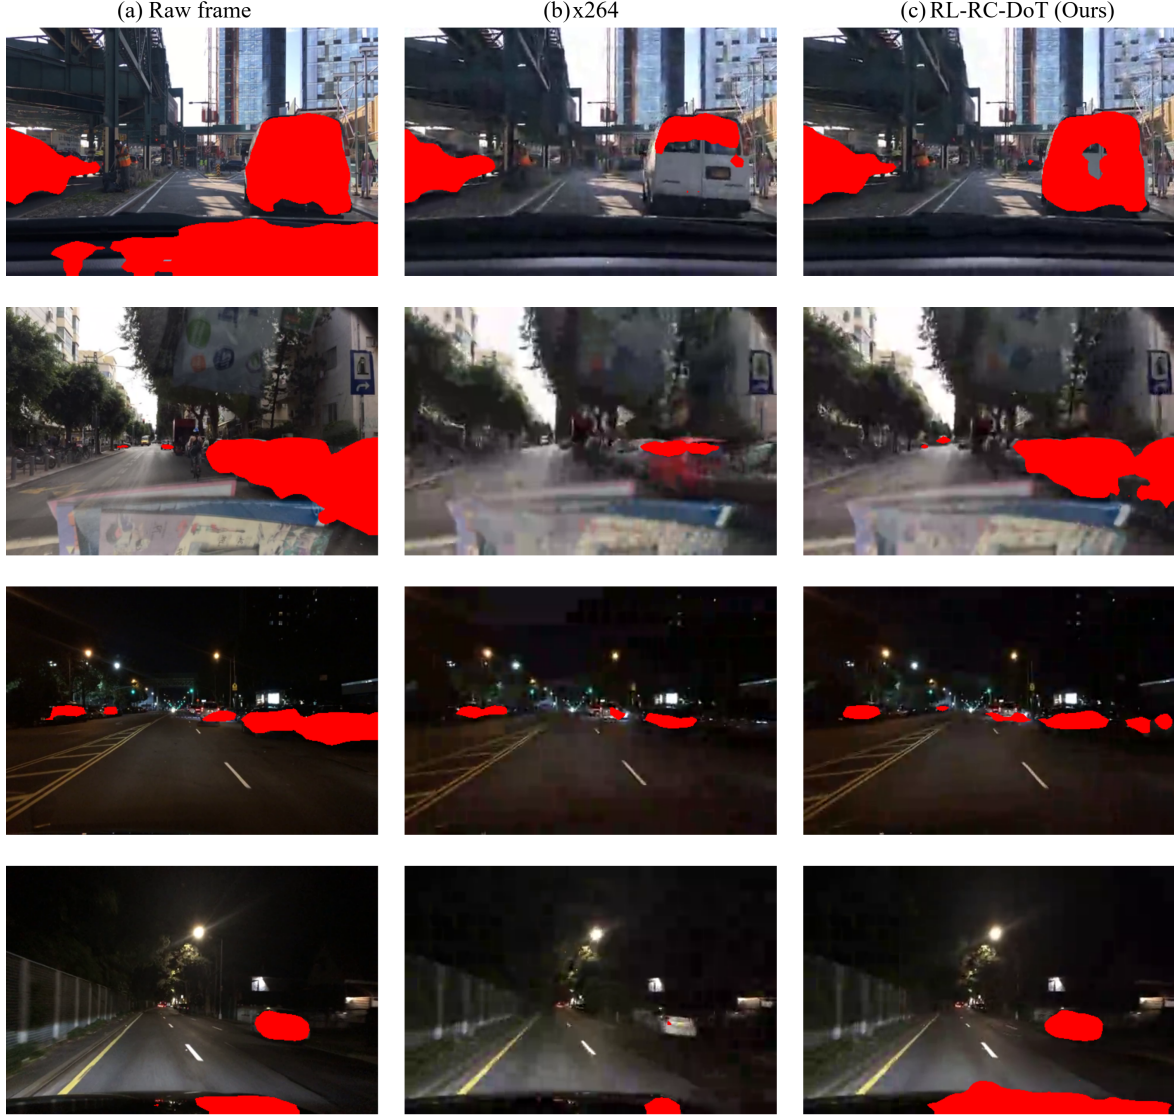

Figure 10. Car segmentation result comparison. (a) segmentation output on x264 reconstructed frame, (b) output on raw frame and (c) output on RL-RC-DoT reconstructed frame. Notice that both RL-RC-DoT and x264 used the same target bit-rate

### 7.3.3. Quantization map analysis

To gain more insight into how our approach affects QP map, we quantified the relation between the QP map and areas in the video that are useful for car detection. Specifically, we computed the KL-divergence between normalized QP-maps and [Eigen-CAM](#) [27] spatial map. Figure 4 illustrates the three maps for one frame, showing that RL-RC-DoT allocates more bits to areas in the frame that are informative for car detection. Figure 11 quantifies this effect across our full test data (mean  $D_{kl}$  RL-RC-DoT = 2.6 , x264=4.4).

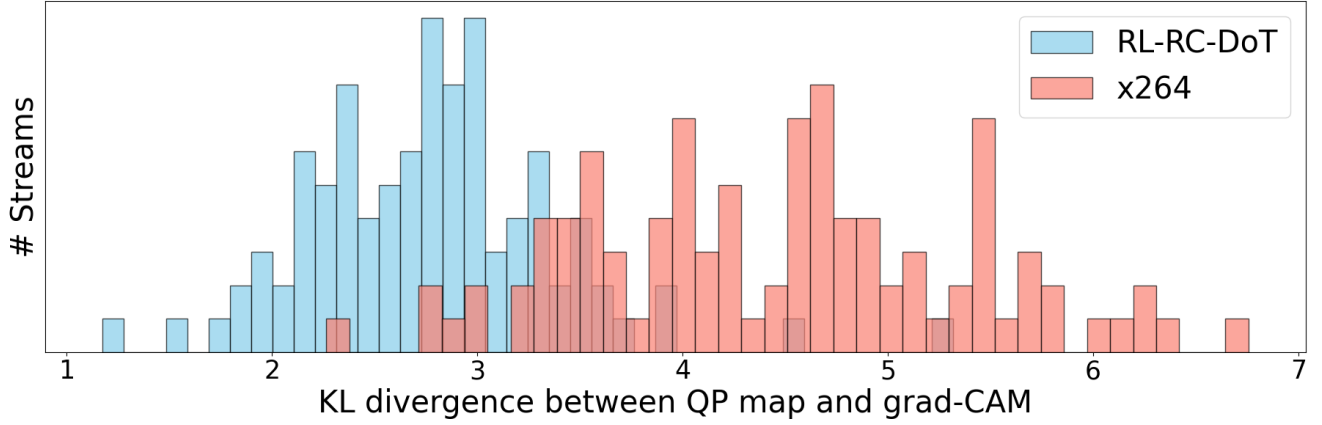

Figure 11. Distribution of average KL divergence between QP maps and Eigen-CAM.

#### 7.4. Task accuracy to distortion trade-off

As previously discussed, RL-RC-DoT gains BD-rate reductions of  $24.7\%(\pm 1.38\%)$  with respect to car detection precision task, while paying a minimal cost to overall video quality, as evidenced by a slight increase in PSNR BD-rate of  $1.19\%(0.46\%)$ . This is important since we want video to still be watchable by human eyes, for validation purposes and robustness to changing task models.

To further illustrate this point, in Figure 12 we show the PSNR and task performance BD-rate obtained by RL-RC-DoT for each stream in the test set. In the plots we see the PSNR varies around 0 while the tasks performance is well below.

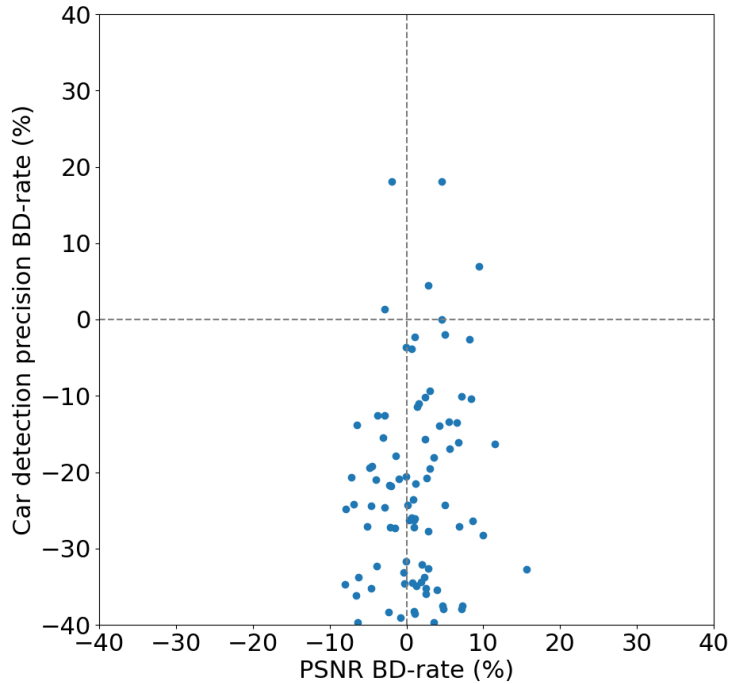

Figure 12. PSNR BD-rate to detection precision BD-rate, where each point represent a single stream in the test set



### 7.5. Action Space Resolution

Since we show our results on a videos of size 480x320 with macro-blocks of size 16x16, the action space is of size 30x20. The size of the action space drastically affects the performance of the agent and the convergence rate of the training process. Thus, we propose to set a lower resolution action space and upsample to the original action space by interpolation. The trade-off here is clear – if we make decisions in high resolution, the agent can take a long time to converge, whereas a low resolution decision will not provide the finer control required for accurate bit allocation for the downstream-task resulting in a sub-optimal performance. We illustrate this notion in Figure 13. We plot the task BD-rate for multiple choices of resolution reduction ratios for each of the tasks. The plot indeed shows the trade-off between the two, where each task has a different optimal choice for action space resolution. We note that these results may depend on the number of frames allotted for training, where we expect longer training to benefit lower resolutions.

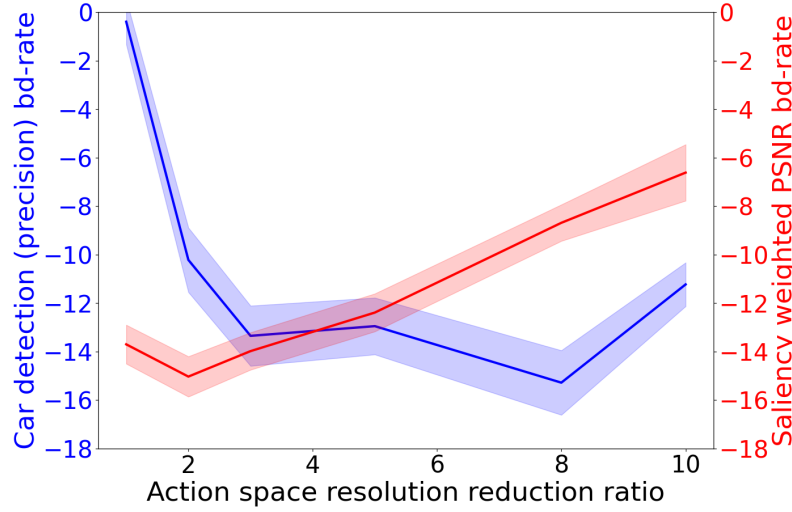

Figure 13. The effect of action space resolution on the BD-rate for both tasks

## 7.6. BDD100K streams

Here we elaborate on the streams we used from bdd100k dataset [46]:

| Train streams     |                   |
|-------------------|-------------------|
| 0000f77c-6257be58 | 000e0252-8523a4a9 |
| 000f157f-dab3a407 | 000f8d37-d4c09a0f |
| 00a04f65-af2ab984 | 00a0f008-3c67908e |
| 00a0f008-a315437f | 00a1176f-0652080e |
| 00a1176f-5121b501 | 00a2e3ca-5c856cde |
| 00a2e3ca-62992459 | 00a2f5b6-d4217a96 |
| 00a395fe-d60c0b47 | 00a9cd6b-b39be004 |
| 00abd8a7-ecd6fc56 | 00abf44e-04004ca0 |
| 00adbb3f-7757d4ea | 00afa5b2-c14a542f |
| 00afa6b9-4efe0141 | 00b04b30-501822fa |
| 00b1dfed-a89dbe2b | 00be7020-457a6db4 |
| 00beeb02-ba0790aa | 00c12bd0-bb46e479 |
| 00c29c52-f9524f1e | 00c41a61-4ba25ad4 |
| 00c497ae-595d361b | 00c87627-b7f6f46c |
| 00ca8821-db8033d5 | 00cb28b9-08a22af7 |
| 00ccf2e8-59a6bfc9 | 00ccf2e8-ac055be6 |
| 00ccf2e8-f8c69860 | 00ce6f6d-50bbe62  |
| 00ce8219-12c6d905 | 00ce8219-d0b5582e |
| 00cef86b-204ea619 | 00cef86b-d8d105b9 |
| 00cf8e3d-3d27efb0 | 00cf8e3d-4683d983 |
| 00cf8e3d-773de15e | 00cf8e3d-a7b4978c |
| 00d0f034-6d666f7b | 00d18b13-52d3e4c4 |
| 00d4b6b7-7d0a60bf | 00d4b6b7-a0b1a3e0 |
| 00d7268f-fd4487be | 00d79c0a-23bea078 |
| 00d79c0a-a2b85ca4 | 00d84b1d-21e6fe01 |
| 00d8944b-e157478b | 00d8d95a-74aa476a |
| 00d9e313-7d75bb18 | 00d9e313-926b6698 |
| 00dc5030-237e7f71 | 00de601c-858a8a8d |
| 00de601c-cfa2404b | 00e49ed1-9d41220c |
| 00e4cae5-c0582574 | 00e5e793-f94de032 |
| 00e81dcc-b1dd9e7b | 00e8c106-e197c4b1 |
| 00c50078-6298b9c1 | 00b93c6e-6298aa25 |
| 0000f77c-cb820c98 |                   |

Table 10. List of streams used in training

| Validation streams |                   |
|--------------------|-------------------|
| 00d8d95a-47d98291  | 00e02d60-54df99d1 |
| 00a820ef-d655700e  | 00ce95b0-84be34a3 |
| 00d15d58-9197cde54 | 00b04b12-a7d7eb85 |
| 00c17a92-d4803287  |                   |

Table 11. List of streams used in validation

| Test streams      |                   |                   |                   |
|-------------------|-------------------|-------------------|-------------------|
| cd35ea13-f49ee278 | cd389564-8be2128e | cdc05b0a-3bb83a9c | cd389564-9053f5fc |
| cd3b1173-63cb9e2e | cd3dab20-1b3e564e | cd3dab20-4ea3d971 | cd3df92f-d04e142c |
| cd40cb21-18170d03 | cd4ac25c-61a9eb11 | cd4bf816-2abb75c9 | cd4bf816-c2f9bf78 |
| cd4ce4e5-6994fd2d | cd4ce4e5-d0968ec0 | cd4da443-da4fe8c7 | cd4deee2-0703d1c7 |
| cd4deee2-1d9539bd | cd4deee2-37c8b95c | cd4deee2-3feadd6e | cd4deee2-60291439 |
| cd4deee2-688c8bba | cd4deee2-8e12e5b5 | cd4deee2-9c9f6da1 | cd4deee2-adc7e92a |
| cd4deee2-ce4f69f5 | cd4deee2-d078d54a | cd547736-3b63cb96 | cd583365-462cca17 |
| cd5a94cf-345f214a | cd5a9e1b-86faac85 | cd5b2540-465c9328 | cd5b2540-913cb8f7 |
| cd5bee17-bef4f177 | cd5db4e0-1189ff83 | cd6af452-e54a1e36 | cd6c087e-03ca2127 |
| cd6fdd33-ac9cb2db | cd704168-1231930e | cd7c12c7-7029da5d | cd7c12c7-9b46c2a8 |
| cd7c92a7-3b20257f | cd7c92a7-89b23268 | cd7c92a7-9222ee19 | cd7c92a7-ed0d3926 |
| cd7ee0b1-dd286a1b | cd7fb8f1-3d347a66 | cd828461-db8b4612 | cd839842-cd859db0 |
| cd8b00aa-4aac0701 | cd8b00aa-5c017145 | cd8b00aa-f00ad3b9 | cd8b30b0-51369077 |
| cd8b30b0-e8d12cc4 | cd8d2fde-2d2a3211 | cd9b6b86-9f62a970 | cd9b6b86-be582832 |
| cd9cd3dd-d67bf5b6 | cd9d84d4-f59d3feb | cd9dff27-94731aba | cd9e7e2b-4b274850 |
| cda33556-28510da1 | cda33556-8dc294b4 | cda33556-c6b3dd45 | cda55704-362ddfea |
| cda55704-754aac99 | cda63e8d-0afb5f2b | cda63e8d-76b2fa43 | cda9acc1-1a92349d |
| cda9acc1-4469e473 | cda9acc1-9d1ef61a | cdac4037-afed765d | cdac7315-fe37a1d9 |
| cdae6e60-0fb06a75 | cdae6e60-334ffc87 | cdae6e60-b729f2e6 | cdae377-1eccb13a  |
| cdae377-2263611a  | cdae377-2b38ae2c  | cdb06fa9-cfb70e11 | cdb06fa9-eba5643a |
| cdb3b01b-673f85b7 | cdb616df-393f382c | cdb688d4-33f24ca3 | cdb6b049-c96359c8 |
| cdb815da-d03b9395 | cdb992be-f0f1613c | cdbb20a9-bdab1f4e | cdbbac37-49c0a335 |
| cdbc7842-b72c4915 | cbd1882-bdd416ea  | cdbeedfd-4ab64af8 | cdbf4bd1-0c65ed7a |
| cdc05b0a-3bb83a9c | cdc05b0a-c53c36a6 | cdc05b0a-c6e8b6ec | cdc05b0a-ce908cf7 |
| cdc05b0a-d4ff800b | cd3dab20-1b3e564e | cdc05b0a-efb78be5 | cdc05b0a-f2a67b44 |

Table 12. List of streams used in test

## 7.7. Reproducibility of experiments

**Encoder environment:** To apply rate-control on the environment we changed the code of the open source x264 [26] encoder so that in each frame it can obtain delta-QP values externally and provide relevant statistics as described in Appendix 7.1.1.

**RL Agent:** We provide a description of the policy’s architecture in Appendix 7.1.2. The agent was trained using PPO implementation from stable-baselines3 [30] with default parameters, where we just added an MSE prediction loss (with weight 0.1) for reward info. We used  $\lambda = 20$  to average between the bit-rate and downstream task rewards.

**Experiments:** In our experiments we used the publicly available BDD100K dataset (4.1) which was resized using the open source package ffmpeg[37]. We provide the named list of streams we used in Appendix 7.6. In the experimental details subsection 4.4 we provide additional information on the hardware we used and the downstream task models we used for our experiments.

**Hardware:** To facilitate efficient training, we utilize 8 parallel environments running on an Intel(R) Xeon(R) CPU E5-2698 v4 @ 2.20GHz, complemented by an NVIDIA Tesla V100 32GB GPU. Each agent undergoes training on 20 million frames, a process that spans approximately 4 days.
